# Supplementary material
Source: PubMed Central journal article supplement (PMC8191026)
Supplement: 12890_2021_1560_MOESM2_ESM.pdf [file 12890_2021_1560_MOESM2_ESM.pdf]

**Appendix 2: Quality assessment and data extraction form**

Reviewer Name:

Date of the review:

**General information**

|                                    |  |
|------------------------------------|--|
| Study title                        |  |
| Authors                            |  |
| Year of publication                |  |
| Publishing journal                 |  |
| Country of study                   |  |
| Study funding/conflict of interest |  |

## Eligibility

### 1. Is this a case-controlled study?

YES  If YES, *please exclude and return to Basem immediately*

NO  If NO, please continue

### 2. Was there a clear question for the study to address?

Consider: A question should include information about the population, the test, the setting, and the outcomes

YES  If YES, please continue

NO  If NO, *please exclude and return to Basem immediately*

### 3. Was there a comparison with an appropriate reference standard?

Consider: Is this reference test(s) the best available indicator in the circumstances?

YES  If YES, please continue

NO  If NO, *please exclude and return to Basem immediately*

### 4. Did all patients get the diagnostic test and reference standard?

Consider: Were both received regardless of the results of the test of interest? Check the 2x2 table (verification bias)

YES

NO

### 5. Could the results of the test have been influenced by the results of the reference standard?

Consider: Was there blinding? were the tests performed independently? review bias.

YES

NO

### 6. Is VAP status of the tested population clearly described?

Consider: Presenting symptoms. VAP stage of severity. Co-morbidity. Differential diagnoses (spectrum bias)

YES

NO

7. Were the methods for performing the test described in sufficient detail?

Consider: Was a protocol followed?

YES

NO

8. Were the results clearly presented?

Consider: Are the sensitivity and specificity and/or likelihood ratios presented? Are the results presented in such a way that we can work them out?

YES

NO

9. How sure are we about the results?

Consider: Could they have occurred by chance? Are there confidence limits? What are they?

YES

NO

**Methods:**

|                        |  |
|------------------------|--|
| Research method        |  |
| Population of interest |  |
| Inclusion criteria     |  |
| Exclusion criteria     |  |

**Population and Sampling**

|                                                |  |
|------------------------------------------------|--|
| Population                                     |  |
| Sample size (enrolled)                         |  |
| Sample source                                  |  |
| Sampling method                                |  |
| Participants age                               |  |
| Participants Sex (M/F)                         |  |
| Number of participants who completed the study |  |

## Methods

|                                                                                             |  |
|---------------------------------------------------------------------------------------------|--|
| Study main aim                                                                              |  |
| Primary outcome                                                                             |  |
| Secondary outcome                                                                           |  |
| Index test(s) and Synonyms                                                                  |  |
| Reference standard<br>(comparator test)                                                     |  |
| Description of procedure                                                                    |  |
| Clinical expertise or training<br>required for the procedure                                |  |
| Equipment required for the<br>test                                                          |  |
| Indicated results range for<br>action (what are the<br>thresholds that triggers<br>action?) |  |

## Results

|                                      |                                                                                                                              |  |
|--------------------------------------|------------------------------------------------------------------------------------------------------------------------------|--|
| Study results                        | Accuracy                                                                                                                     |  |
|                                      | Effectiveness                                                                                                                |  |
|                                      | Clinical acceptability                                                                                                       |  |
| Reported statistical results         |                                                                                                                              |  |
| Any adverse effects of the procedure |                                                                                                                              |  |
| Treatment decisions                  | <ol style="list-style-type: none"> <li>1. No action</li> <li>2. Initiated</li> <li>3. Amended</li> <li>4. Stopped</li> </ol> |  |
| Conclusion                           |                                                                                                                              |  |
| Reported strengths of test           |                                                                                                                              |  |
| Reported weaknesses of test          |                                                                                                                              |  |
| Additional comments                  |                                                                                                                              |  |
